# Supplementary material
Source: HighWire-hosted journal article supplement (https://www.jrheum.org/highwire/filestream/38292/field_highwire_adjunct_files/0/190259DataSuppl.pdf)
Supplement: 190259DataSuppl.pdf [file 190259DataSuppl.pdf]

## ONLINE SUPPLEMENTARY DATA

**Supplementary Table 1.** Clinical characteristics at study entry and at 1, 3, and 5 years post study entry

| Supplementary Table 1A, in overall cohort (SLEDAI-2K ≥6) |                                              |                                       |                                        |                                        |
|----------------------------------------------------------|----------------------------------------------|---------------------------------------|----------------------------------------|----------------------------------------|
|                                                          | Study entry<br>(where applicable)<br>(N=649) | 1 year post study<br>entry<br>(n=649) | 3 years post study<br>entry<br>(n=649) | 5 years post study<br>entry<br>(n=507) |
| Disease duration, years, mean (SD)                       | 7.3 (7.6)                                    | 8.1 (7.6)                             | 10.1 (7.6)                             | 11.8 (7.4)                             |
| SLEDAI-2K score, mean (SD)                               | 11.2 (4.8)                                   | 5.8 (5.0)                             | 4.8 (4.7)                              | 4.1 (3.9)                              |
| AMS up to years, mean (SD)                               | n/a                                          | 7.0 (3.9)                             | 5.7 (3.3)                              | 5.0 (2.9)                              |
| Number of patients with SDI score >0, n (%)              | 211 (32.5)                                   | 231 (35.6)                            | 299 (46.1)                             | 269 (53.1)                             |
| SDI score in patients with score >0, mean (SD)           | 2.0 (1.5)                                    | 2.0 (1.5)                             | 2.1 (1.6)                              | 2.2 (1.5)                              |
| Steroids at years, n (%)                                 | 435 (67.0)                                   | 466 (71.8)                            | 433 (66.7)                             | 299 (59.0)                             |
| Antimalarials at years, n (%)                            | 333 (51.3)                                   | 409 (63.0)                            | 429 (66.1)                             | 324 (63.9)                             |
| Immunosuppressants at years, n (%)                       | 209 (32.2)                                   | 291 (44.8)                            | 324 (49.9)                             | 213 (42.0)                             |

**Supplementary Table 1B, in subcohort of patients with SLEDAI-2K at study entry = 6 OR 7**

|                                                | <b>Study entry<br/>(where applicable)<br/>(n=117)</b> | <b>1 year post study<br/>entry<br/>(n=117)</b> | <b>3 years post study<br/>entry<br/>(n=117)</b> | <b>5 years post study<br/>entry<br/>(n=87)</b> |
|------------------------------------------------|-------------------------------------------------------|------------------------------------------------|-------------------------------------------------|------------------------------------------------|
| Disease duration, years, mean (SD)             | 8.8 (8.5)                                             | 9.6 (8.5)                                      | 11.6 (8.5)                                      | 13.0 (8.3)                                     |
| SLEDAI-2K score, mean (SD)                     | 6.4 (2.6)                                             | 3.6 (3.0)                                      | 3.1 (3.8)                                       | 2.8 (3.2)                                      |
| AMS up to years, mean (SD)                     | n/a                                                   | 4.1 (2.1)                                      | 3.4 (2.3)                                       | 2.9 (1.9)                                      |
| Number of patients with SDI score >0, n (%)    | 44 (37.6)                                             | 46 (39.3)                                      | 54 (46.2)                                       | 41 (47.1)                                      |
| SDI score in patients with score >0, mean (SD) | 1.8 (1.3)                                             | 1.9 (1.4)                                      | 2.0 (1.4)                                       | 2.0 (1.3)                                      |
| Steroids at years, n (%)                       | 67 (57.3)                                             | 68 (58.1)                                      | 58 (49.6)                                       | 34 (39.1)                                      |
| Antimalarials at years, n (%)                  | 63 (53.8)                                             | 73 (62.4)                                      | 76 (65.0)                                       | 52 (59.8)                                      |
| Immunosuppressants at years, n (%)             | 37 (31.6)                                             | 48 (41.0)                                      | 49 (41.9)                                       | 28 (32.2)                                      |

**Supplementary Table 1C, in subcohort of patients with SLEDAI-2K at study entry = 8 OR 9**

|                                                | <b>Study entry<br/>(where applicable)<br/>(n=122)</b> | <b>1 year post study<br/>entry<br/>(n=122)</b> | <b>3 years post study<br/>entry<br/>(n=122)</b> | <b>5 years post study<br/>entry<br/>(n=97)</b> |
|------------------------------------------------|-------------------------------------------------------|------------------------------------------------|-------------------------------------------------|------------------------------------------------|
| Disease duration, years, mean (SD)             | 7.4 (8.2)                                             | 8.1 (8.2)                                      | 10.1 (8.2)                                      | 11.9 (8.3)                                     |
| SLEDAI-2K score, mean (SD)                     | 8.2 (0.4)                                             | 4.1 (3.2)                                      | 3.5 (3.5)                                       | 3.0 (2.5)                                      |
| AMS up to years, mean (SD)                     | n/a                                                   | 5.2 (2.1)                                      | 4.2 (2.3)                                       | 3.7 (2.0)                                      |
| Number of patients with SDI score >0, n (%)    | 37 (30.3)                                             | 41 (33.6)                                      | 49 (40.2)                                       | 45 (46.4)                                      |
| SDI score in patients with score >0, mean (SD) | 1.9 (1.0)                                             | 2.0 (1.0)                                      | 2.0 (1.0)                                       | 2.1 (1.1)                                      |
| Steroids at years, n (%)                       | 60 (49.2)                                             | 70 (57.4)                                      | 64 (52.5)                                       | 41 (42.3)                                      |
| Antimalarials at years, n (%)                  | 70 (57.4)                                             | 88 (72.1)                                      | 87 (71.3)                                       | 69 (71.1)                                      |
| Immunosuppressants at years, n (%)             | 28 (23.0)                                             | 40 (32.8)                                      | 44 (36.1)                                       | 32 (33.0)                                      |

**Supplementary Table 1D, in subcohort of patients with SLEDAI-2K at study entry  $\geq 10$**

|                                                   | <b>Study entry<br/>(where applicable)<br/>(n=410)</b> | <b>1 year post study<br/>entry<br/>(n=410)</b> | <b>3 years post study<br/>entry<br/>(n=410)</b> | <b>5 years post study<br/>entry<br/>(n=323)</b> |
|---------------------------------------------------|-------------------------------------------------------|------------------------------------------------|-------------------------------------------------|-------------------------------------------------|
| Disease duration, years, mean (SD)                | 6.9 (7.1)                                             | 7.7 (7.1)                                      | 9.7 (7.1)                                       | 11.5 (6.9)                                      |
| SLEDAI-2K score, mean (SD)                        | 13.4 (4.5)                                            | 7.0 (5.4)                                      | 5.6 (5.1)                                       | 4.8 (4.3)                                       |
| AMS up to years, mean (SD)                        | n/a                                                   | 8.4 (4.0)                                      | 6.7 (3.4)                                       | 6.0 (2.9)                                       |
| Number of patients with SDI score $>0$ , n (%)    | 130 (31.7)                                            | 144 (35.1)                                     | 196 (47.8)                                      | 183 (56.7)                                      |
| SDI score in patients with score $>0$ , mean (SD) | 2.0 (1.6)                                             | 2.1 (1.6)                                      | 2.1 (1.8)                                       | 2.2 (1.7)                                       |
| Steroids at years, n (%)                          | 308 (75.1)                                            | 328 (80.0)                                     | 311 (75.9)                                      | 224 (69.3)                                      |
| Antimalarials at years, n (%)                     | 200 (48.8)                                            | 248 (60.5)                                     | 266 (64.9)                                      | 203 (62.8)                                      |
| Immunosuppressants at years, n (%)                | 144 (35.1)                                            | 203 (49.5)                                     | 231 (56.3)                                      | 153 (47.4)                                      |

AMS, adjusted mean SLEDAI; n/a, not applicable; SD, standard deviation; SDI, Systemic Lupus International Collaborating Clinics (SLICC)/American College of Rheumatology (ACR) Damage Index; SLEDAI-2K, Systemic Lupus Erythematosus Disease Activity Index-2000.
